# Supplementary material for: Survival in severe pulmonary hypertension due to chronic lung disease: influence of in-hospital platelet distribution width
Source: PubMed Central journal article supplement — Pulm Circ. 2021 Jun 30;11(3):20458940211026484. doi: 10.1177/20458940211026484 (PMC8258768; doi:10.1177/20458940211026484), 2021-06-30
Supplement: sj-pdf-1-pul-10.1177_20458940211026484.pdf [file sj-pdf-1-pul-10.1177_20458940211026484.pdf]

Supplementary table Correlation between demography, pulmonary function test, hemodynamics and PDW

|                                | All patients<br>n = 67 |         |
|--------------------------------|------------------------|---------|
|                                | r                      | p       |
| Age (years)                    | -0.121                 | 0.328   |
| Male (n, %)                    | -0.070                 | 0.573   |
| <i>Pulmonary Function Test</i> |                        |         |
| FEV1% predicted                | -0.063                 | 0.679   |
| FEV1/FVC % predicted           | -0.252                 | 0.092   |
| RV % predicted                 | 0.224                  | 0.149   |
| TLC % predicted                | 0.261                  | 0.091   |
| DLCO % predicted               | -0.114                 | 0.529   |
| <i>Hemodynamics</i>            |                        |         |
| mPAP, mm Hg                    | 0.204                  | 0.097   |
| PAWP, mm Hg                    | 0.085                  | 0.492   |
| CO, L/min                      | -0.117                 | 0.347   |
| CI, L/min/m <sup>2</sup>       | -0.120                 | 0.335   |
| PVR, Wood units                | 0.137                  | 0.267   |
| <i>Echocardiography</i>        |                        |         |
| LVEF, %                        | -0.004                 | 0.977   |
| RATD, cm                       | 0.334                  | 0.006 § |
| RALD, cm                       | 0.191                  | 0.121   |
| RVEDTD, cm                     | 0.185                  | 0.133   |
| RVEDLD, cm                     | 0.221                  | 0.072   |
| PASP, mmHg                     | 0.173                  | 0.161   |
| TAPSE, cm                      | -0.158                 | 0.203   |
| ENDSEI                         | 0.280                  | 0.021*  |

Abbreviations: mPAP: mean pulmonary artery pressure; PAWP: pulmonary artery wedge pressure; CO: cardiac output; CI: cardiac index; PVR: pulmonary vascular resistance; FEV1: forced expiratory volume in 1 s; FVC: forced vital capacity; RV: residual volume; TLC: total lung capacity; DLCO: diffusion capacity for carbon monoxide of the lung; PDW: platelet distribution width; RVEDTD: right ventricular end-diastolic transverse dimension; RVEDLD: right ventricular end-diastolic longitudinal dimension; RATD: right atrial transverse dimension; RALD: right atrial longitudinal dimension; PASP: pulmonary arterial systolic pressure; ENDSEI: end-

---

systolic stage eccentricity index; TAPSE: tricuspid annular plane systolic excursion; LVEF: left ventricular ejection fraction. \* P < 0.05, § < 0.01
